# Supplementary material for: Hydrogen-bond strengths by magnetically induced currents
Source: Royal Society of Chemistry journal article supplement (doi:10.1039/c0cp00622j), 2010-11-12
Supplement: c0cp00622j.pdf [file c0cp00622j.pdf]

# Supplementary material

## Hydrogen-bond strengths by magnetically induced currents<sup>†</sup>

Heike Fliegl,<sup>a</sup> Olli Lehtonen,<sup>a</sup> Dage Sundholm,<sup>\*a</sup> and Ville R. I. Kaila<sup>\*a,b</sup>

Received Xth XXXXXXXXXXXX 20XX, Accepted Xth XXXXXXXXXXXX 20XX

First published on the web Xth XXXXXXXXXXXX 200X

DOI: 10.1039/b000000x

### 1 Current strength evaluation

The critical points along and in the vicinity of an H-bond were studied, to obtain a representative current strength passing the bond of interest and to avoid induction of ring currents circulating around the complete H-bonded dimer. This behaviour was investigated by applying the external magnetic field in different directions relative to the molecular plane. Ring currents were avoided when the external magnetic field was set parallel to the molecular plane. For consistency, the same procedure was applied for all H-bonded dimers used in the linear fit.

The placement and size of the integration domain perpendicular to the studied H-bond was chosen such that spurious current contributions from neighbouring atoms as well as edge currents circulating around the monomer are avoided. This was realised in two steps. First, the current strength passing the bond was integrated in discrete spatial points along the H-bond using a rectangular integration plane of 6-8 bohr (1 bohr = 0.529 Å). The integration plane was then placed at the position where the minimum current strength was obtained. In the second step, the width of the integration plane was varied, while the height was kept fixed at 10 bohr. The current strength as a function of the width showed two minima which define the beginning and the end of the final integration domain, yielding the data in Fig. 1 of the main paper.

### 2 Employed fit set and error estimation

Table 1 shows the calculated H-bond energies and current strengths, used as input for the linear fit. The linear regression was obtained with gnuplot<sup>1</sup> using a least squares fit procedure

$$J_{\text{dia}}(E) = aE + b. \quad (1)$$

The respective constants  $a$  and  $b$  are given in Table 2, together with standard deviations of the fitting error. The squared linear

correlation coefficient of the curves are  $r_{BP86}^2 = 0.83$ ,  $r_{B3LYP}^2 = 0.86$ ,  $r_{MP2}^2 = 0.84$ . The expected error of the method for an H-bond of strength  $E$  was estimated as,

$$\Delta E = \frac{1}{a} \sqrt{E^2(\Delta a)^2 + (\Delta b)^2}, \quad (2)$$

which gives for the B3LYP calculations an expected error of,

$$\Delta E_{B3LYP} = \frac{\sqrt{0.0001E^2 + 0.006}}{0.078}. \quad (3)$$

A linear relation between intramolecular hydrogen bond strengths and proton shieldings has recently been described in other work.<sup>2,3</sup> Figures 2 and 3 of the main manuscript were prepared using VMD.<sup>4</sup>

### References

- 1 <http://www.gnuplot.info/>.
- 2 A. Ebrahimi, S. M. H. Khorasani and R. S. Neyband, *Int. J. Quantum Chem.*, 2010, **110**, 1871–1879.
- 3 R. A. Klein, *J. Comput. Chem.*, 2003, **24**, 1120–1131.
- 4 W. Humphrey, A. Dalke and K. Schulten, *J. Mol. Graphics*, 1996, **14**, 33.

<sup>a</sup> Department of Chemistry, P.O. Box 55 (A.I. Virtanens plats 1), FI-00014 University of Helsinki, Finland. Fax: +358-9-191 50169; Tel: +358-9-191-50176; Dage.Sundholm@helsinki.fi

<sup>b</sup> Helsinki Bioenergetics Group, Structural Biology and Biophysics Programme, Institute of Biotechnology, University of Helsinki, P. O. Box 65, FI-00014 Helsinki, Finland; Ville.Kaila@helsinki.fi

**Table 1** Calculated H-bond energies in kcal/mol and current strengths in nA/T for H-bonded dimers. In all calculations, the def2-TZVPP basis set has been applied.

| dimer                             | method | $R_{X-H}$ pm | H-bond energy in kcal/mol | $J_{dia}$ in nA/T |
|-----------------------------------|--------|--------------|---------------------------|-------------------|
| NH <sub>3</sub> -NH <sub>3</sub>  | BP86   | 225.82       | -2.74                     | 0.7               |
|                                   | B3LYP  | 231.03       | -2.85                     | 0.6               |
|                                   | MP2    | 226.83       | -3.37                     | 0.6               |
| NH <sub>3</sub> -HF               | BP86   | 164.94       | -13.77                    | 1.5               |
|                                   | B3LYP  | 169.03       | -13.29                    | 1.3               |
|                                   | MP2    | 169.80       | -12.83                    | 1.1               |
| NH <sub>3</sub> -HCl              | BP86   | 164.60       | -10.31                    | 1.0               |
|                                   | B3LYP  | 176.57       | -8.82                     | 1.0               |
|                                   | MP2    | 178.25       | -9.12                     | 0.7               |
| NH <sub>3</sub> -H <sub>2</sub> O | BP86   | 193.70       | -6.57                     | 1.1               |
|                                   | B3LYP  | 198.80       | -6.47                     | 1.0               |
|                                   | MP2    | 197.68       | -6.77                     | 0.8               |
| H <sub>2</sub> O-HF               | BP86   | 167.67       | -9.37                     | 1.2               |
|                                   | B3LYP  | 170.39       | -9.43                     | 1.1               |
|                                   | MP2    | 171.10       | -9.12                     | 0.9               |
| H <sub>2</sub> O-HCl              | BP86   | 179.00       | -6.09                     | 1.0               |
|                                   | B3LYP  | 187.65       | -5.68                     | 0.9               |
|                                   | MP2    | 187.70       | -6.08                     | 0.7               |
| H <sub>2</sub> O-H <sub>2</sub> O | BP86   | 193.16       | -4.93                     | 0.9               |
|                                   | B3LYP  | 196.00       | -5.16                     | 0.8               |
|                                   | MP2    | 195.29       | -5.37                     | 0.7               |
| HCHO-NH <sub>3</sub>              | BP86   | 232.63       | -2.51                     | 0.5               |
|                                   | B3LYP  | 234.80       | -3.01                     | 0.4               |
|                                   | MP2    | 226.96       | -4.01                     | 0.5               |
| HCHO-HF                           | BP86   | 168.95       | -8.02                     | 1.0               |
|                                   | B3LYP  | 171.98       | -8.29                     | 1.0               |
|                                   | MP2    | 172.32       | -8.35                     | 0.8               |
| HCHO-HCl                          | BP86   | 179.26       | -5.07                     | 0.9               |
|                                   | B3LYP  | 189.03       | -4.83                     | 0.8               |
|                                   | MP2    | 185.49       | -5.92                     | 0.7               |
| HCHO-H <sub>2</sub> O             | BP86   | 197.17       | -4.11                     | 0.7               |
|                                   | B3LYP  | 200.80       | -4.58                     | 0.5               |
|                                   | MP2    | 198.76       | -5.45                     | 0.6               |

**Table 2** Calculated fit constants  $a$  [nA mol kcal<sup>-1</sup> T<sup>-1</sup>] and  $b$  [nA T<sup>-1</sup>] according to equation 1 and asymptotic standard error in %.

| method | $a$        | $b$      | $\Delta a$ in % | $\Delta b$ in % |
|--------|------------|----------|-----------------|-----------------|
| BP86   | -0.0703814 | 0.477962 | 14.86           | 16.28           |
| B3LYP  | -0.0780517 | 0.344827 | 13.31           | 21.76           |
| MP2    | -0.0550801 | 0.349201 | 14.65           | 17.13           |
